1 **Correction of measurement error in a commercial multiple-breath washout**  
2 **device**

3 Florian Wyler\*<sup>1</sup> (<https://orcid.org/0000-0002-1232-1392>)

4 Marc-Alexander Oestreich\*<sup>1,2</sup> (<https://orcid.org/0000-0001-9641-3691>)

5 Bettina S. Frauchiger<sup>1,3</sup> (<https://orcid.org/0000-0002-9519-9328>)

6 Kathryn Ramsey<sup>#1</sup> (<https://orcid.org/0000-0003-4574-6917>)

7 Philipp Latzin<sup>#1</sup> (<https://orcid.org/0000-0002-5239-1571>)

8 \* Authors contributed equally to this work as first author

9 # Authors contributed equally to this work as last author

10

11 <sup>1</sup> Pediatric Respiratory Medicine, Inselspital, University Children's Hospital of Bern, University  
12 of Bern, Switzerland.

13 <sup>2</sup> Graduate School for Health Sciences, University of Bern, Switzerland.

14 <sup>3</sup> Graduate School of Cellular and Biomedical Sciences, University of Bern, Switzerland

15

16 **Abstract**

17 Rationale:

18 Nitrogen multiple-breath washout (N<sub>2</sub>MBW) is an established technique to assess functional  
19 residual capacity (FRC) and ventilation inhomogeneity in the lung. Accurate measurement of  
20 gas concentrations is essential for the appropriate calculation of clinical outcomes.

21 Objectives:

22 We investigated the accuracy of oxygen and carbon dioxide measurements used for the  
23 indirect calculation of nitrogen concentration in a commercial MBW device (Exhalyzer D, Eco  
24 Medics AG, Duernten, Switzerland) and its impact on FRC and lung clearance index (LCI).

25 Methods:

26 High precision calibration gas mixtures and mass spectrometry were used to evaluate sensor

27 output. We assessed the impact of corrected signal processing on FRC and LCI in a dataset  
28 of healthy children and children with cystic fibrosis using custom analysis software.

29 Results:

30 We found inadequate correction for the cross sensitivity of the oxygen and carbon dioxide  
31 sensors in the Exhalyzer D device. This results in an overestimation of expired nitrogen  
32 concentration, and consequently FRC and LCI outcomes. Breath-by-breath correction of this  
33 error reduced mean (SD) FRC by 8.9 (2.2)% and LCI by 11.9 (4.0)%. It also resulted in almost  
34 complete disappearance of the tissue nitrogen signal at the end of measurements.

35 Conclusions:

36 Inadequate correction for cross sensitivity between the oxygen and carbon dioxide gas sensors  
37 of the Exhalyzer D device leads to an overestimation of FRC and LCI. Correction of this error  
38 is possible and could be applied by re-analysing the measurements breath-by-breath in an  
39 updated software version.

40

#### 41 **Corresponding Author**

42 Prof. Philipp Latzin, MD, PhD

43 Inselspital, University Children's Hospital of Bern

44 Freiburgstrasse 8, 3010 Bern, Switzerland

45 E-mail: philipp.latzin@insel.ch

46 Phone: +41 31 632 9353

47

#### 48 **Author contributions**

49 F.W. and M.O. designed performed and analysed experiments. M.O., B.F and K.R created and  
50 organized the databases for retrospective analysis. F.W. wrote the manuscript, with major  
51 contributions from M.O, K.R. and P.L. All authors checked the final version of the manuscript.

52

53 **Grants, Gifts, Equipment, Drugs**

54 Eco Medics AG (Duernten, Switzerland) provided a research version of their commercial  
55 software Spiroware 3.2.1 including insight on signal processing algorithms and helped with  
56 the acquisition of mass spectrometry measurements. This project was funded by the Swiss  
57 National Science Foundation, Grant Nr. 182719 (P. Latzin) and 168173 (K. Ramsey)

## 58 **Introduction**

59 Nitrogen multiple-breath washout (N<sub>2</sub>MBW) is an established technique to assess ventilation  
60 inhomogeneity and lung volumes during relaxed tidal breathing<sup>1-3</sup>. The test starts at the end of  
61 a relaxed expiration, with the lung at functional residual capacity (FRC). As subjects inhale  
62 pure oxygen (100% O<sub>2</sub>), resident nitrogen (N<sub>2</sub>) is gradually washed out. The main outcome,  
63 the lung clearance index (LCI), represents the expired volume required to reach 2.5% of the  
64 starting N<sub>2</sub> concentration expressed in multiples of the FRC.

65 The N<sub>2</sub>MBW technique is increasingly being used as a functional measure capable of  
66 monitoring early disease progression more sensitive than spirometry and to capture treatment  
67 effects in patients with conditions such as cystic fibrosis (CF) and primary ciliary dyskinesia  
68 (PCD)<sup>4-8</sup>. The endorsement of the North American Cystic Fibrosis Foundation and the  
69 European Cystic Fibrosis Society Clinical Trials Network consolidated the LCI as an endpoint  
70 in clinical trials in children and adults with CF<sup>3,9-12</sup>. As recommended by different societies,  
71 most data on the efficacy of disease modifying therapies in CF<sup>13,14</sup> were obtained with the  
72 Exhalyzer D / Spiroware setup (Eco Medics AG, Duernten, Switzerland) and this is the device  
73 of choice in multiple ongoing studies with the LCI as a primary endpoint ([www.clinicaltrials.gov](http://www.clinicaltrials.gov):  
74 NCT04138589, NCT03320382, NCT04026360, NCT02657837). Consequently, the correct  
75 measurement of N<sub>2</sub>MBW is of critical importance, notably in studies that serve to guide drug  
76 approval. In this device N<sub>2</sub> concentration is not measured directly, but relies on indirect  
77 determination of nitrogen, through accurate measurement of oxygen (O<sub>2</sub>) and carbon dioxide  
78 (CO<sub>2</sub>)<sup>15</sup>.

79 In this study we investigated the accuracy of indirect measurement of N<sub>2</sub> during MBW tests  
80 using the Exhalyzer D device by i) assessing the sensor accuracy in the Exhalyzer D's O<sub>2</sub> and  
81 CO<sub>2</sub> sensors, ii) establishing a correction for any observed sensor error and iii) assessing the  
82 effect size of sensor error on clinical outcomes (FRC, LCI) as well as on tissue nitrogen.

## 83 **Methods**

### 84 **Study design**

85 This was a combined prospective, experimental and retrospective, observational study to  
86 assess sensor accuracy as well as the impact of sensor inaccuracy using existing N<sub>2</sub>MBW  
87 data. We included experimental data from gas mixture measurements and mass spectrometry  
88 (Eco Medics AG, Duernten, Switzerland). We characterized the impact of the developed  
89 correction functions on MBW outcomes with data from healthy children<sup>16</sup> and children  
90 diagnosed with CF (Swiss Cystic Fibrosis Infant Lung Development (SCILD) cohort)<sup>6,17</sup>. The  
91 Ethics Committee of the Canton of Bern, Switzerland approved the study protocol (PB\_2017-  
92 02139).

#### 93 **i) Sensor accuracy**

94 To measure sensor accuracy over the wide range of concentrations encountered in a N<sub>2</sub>MBW  
95 measurement, we tested the Exhalyzer D sensors with gas mixtures containing known  
96 reference concentrations, and compared concentrations of CO<sub>2</sub> and O<sub>2</sub> measured by the  
97 Exhalyzer D to known reference concentrations (supplemental Table 1). Specifications from  
98 manufacturers of technical gas mixtures (Carbagas AG, Muri bei Bern, Switzerland) and mass  
99 spectrometry measurements (Eco Medics AG, Duernten, Switzerland) served as reference.

### 100 **Equipment**

101 Applying Dalton's law of partial pressures, the Exhalyzer D (Eco Medics AG, Duernten,  
102 Switzerland) computes an indirect nitrogen concentration that is based on the measurement  
103 of oxygen, carbon dioxide and an assumed fixed ratio of nitrogen and argon (supplemental  
104 Equation 1)<sup>18</sup>. While dry atmospheric air contains nitrogen (N<sub>2</sub>), oxygen (O<sub>2</sub>), argon, carbon  
105 dioxide (CO<sub>2</sub>) and traces of neon, helium, methane and krypton, it is assumed that all gases  
106 except oxygen and carbon dioxide (which are affected by tidal breathing) remain in proportion  
107 to each other.

## 108 **Sensor characteristics**

109 The O<sub>2</sub> sensor used in the Exhalyzer D setup (X3004 OEM sensor, Oxigraf Inc., Sunnyvale,  
110 CA, USA) is located within the main structure of the Exhalyzer D. Gas from the patients  
111 breathing stream is sampled at a rate of 200 mL/min via a Nafion tube<sup>18</sup>. The CO<sub>2</sub> sensor  
112 (Capnostat 5, Respironics Inc., Wallingford, CT, USA) is located within the breathing stream.  
113 The Exhalyzer D measures both O<sub>2</sub> and CO<sub>2</sub> using laser absorption spectroscopy, a technique  
114 where the absorption of light is measured at specific frequencies characteristic to each gas<sup>19</sup>.  
115 The absorption spectrum of both gases is affected by a variety of factors, including pressure,  
116 temperature, and the presence of other gases (manufacturer's manual). The presence of O<sub>2</sub>  
117 in the gas mixture affects the absorption spectrum of CO<sub>2</sub> and vice versa.

## 118 **Software for gas sensor measurements**

119 The manufacturer provided a research version of the Exhalyzer D software (Spiroware 3.3.0  
120 Research, Eco Medics AG, Duernten, Switzerland) which enabled technical gas  
121 measurements with direct recording of raw, uncorrected sensor outputs. This software version  
122 is, for the purpose of MBW tests, identical with the commercial release (Spiroware 3.2.1) on  
123 the level of signal processing and analysis.

## 124 **Technical gases**

125 Sensor accuracy was tested over the complete range of concentrations present in N<sub>2</sub>MBW  
126 measurements. Twelve technical gas mixtures (Carbagas AG, Muri bei Bern, Switzerland),  
127 each containing different combinations of CO<sub>2</sub> (2.5%, 5%, 7.5%) and O<sub>2</sub> (30%, 60%, 90%) as  
128 well as three mixtures containing only CO<sub>2</sub> and O<sub>2</sub>, were used (supplemental Table 1).  
129 Technical gas mixtures were manufactured at 2% mixture precision and 1% measurement  
130 precision. Additionally, a series of mass spectrometry measurements was carried out, where  
131 N<sub>2</sub> was kept at 2% to mimic the MBW end of test condition, while CO<sub>2</sub> varied from 0-6% with  
132 the rest of the mixture being O<sub>2</sub>.

### 133 **Measurement conditions for technical gases and mass spectrometry**

134 Sensor accuracy of the Exhalyzer D was assessed under two conditions: i) at body  
135 temperature ( $37.5 \pm 1.5^\circ \text{C}$ ), humidity saturated (MR850 Heated Humidifier, Fisher & Paykel,  
136 Auckland, New Zealand), with technical gas mixture specifications as reference, and ii) at  $35^\circ$   
137 C in a dry, climate-controlled chamber with mass spectrometry (AMIS 2000, Innovision ApS,  
138 Odense, Denmark and Red-y Smart Controller, Voegtlin Instruments GmbH, Muttenz,  
139 Switzerland) as reference. Gas concentrations were measured in triplicates, on two Exhalyzer  
140 D devices (calibrated according the manufacturers manual) for technical gas measurements  
141 and one mass spectrometry device. Additional calibration measurements were carried out  
142 before and after each set of measurements.

### 143 **Signal processing for gas sensors**

144 The  $\text{CO}_2$  signal measured was subsequently corrected with the relevant signal processing of  
145 a standard Exhalyzer D measurement to achieve final sensor readings that were equivalent to  
146 current standard processing during a MBW measurement: For condition i) a  
147 temperature/humidity-dependant "ATP correction" factor was applied to the  $\text{CO}_2$ -signal to  
148 correct for humidity and transform the measured fraction into atmospheric temperature and  
149 pressure (ATP) conditions (Eq. 2 in OLS). For both condition i) and ii), the  $\text{CO}_2$  signal was  
150 corrected with an  $\text{O}_2$ -dependant cross sensitivity correction factor (Eq. 3 in OLS).

### 151 **ii) Correction function fitting**

152 We combined the data of the technical gas mixture and mass spectrometry measurements to  
153 construct a correction function for the  $\text{O}_2$  and  $\text{CO}_2$  sensors. Sensor error was defined as the  
154 absolute difference between measured concentrations of  $\text{O}_2$  and  $\text{CO}_2$  by the Exhalyzer D and  
155 reference values provided by mass spectrometry and the technical gas mixture manufacturer.  
156 We then fitted a 2<sup>nd</sup>-degree two-parameter polynomial through the error for each sensor, as a  
157 function of measured  $\text{O}_2$  and  $\text{CO}_2$  (Eq. 4 in OLS): Fitting was performed using MATLAB 2017b  
158 (Mathworks, Natick, Massachusetts, USA). This characterization of the measurement error as  
159 a function of measured gas concentrations could then be directly used as a correction function

160 for the analysis of MBW measurements, by adding the fitted error for each combination of O<sub>2</sub>  
161 and CO<sub>2</sub> to the respective measured concentrations.

### 162 **iii) Effect size of sensor correction**

#### 163 **Retrospective analysis**

164 We characterized the impact of measurement error on MBW outcomes using a custom Python  
165 script developed by our group, designed to replicate standard Spiroware 3.2.1 signal  
166 processing and outcome calculation of MBW data. The impact of sensor error was assessed  
167 by comparing the outcomes of standard analysis (Exhalyzer D and Spiroware 3.2.1, Eco  
168 Medics AG, Duernten, Switzerland) with the outcomes of a corrected algorithm modified to  
169 include the O<sub>2</sub>-CO<sub>2</sub> cross sensitivity correction functions outlined above.

170 For this, we re-analysed 357 MBW measurements of 85 healthy controls (HC, mean age:  
171 11.1y, SD: 3.8y, range: 6-17.8y) and 62 subjects diagnosed with cystic fibrosis (CF, mean age:  
172 9.5y, SD: 3.5y, range: 4-17.3y) from previous studies<sup>6,16</sup> (OLS Table 2 for details). We included  
173 study visits with at least two acceptable, quality controlled N<sub>2</sub>-MBW measurements, in  
174 accordance with recent consensus guidelines<sup>20</sup>.

#### 175 **Statistical testing**

176 For statistical testing of significance we used STATA 16 (StataCorp LLC, College Station,  
177 Texas, USA). Unpaired t-tests were used for comparisons between healthy controls and  
178 children with cystic fibrosis. Paired t-tests were performed for differences between standard  
179 and corrected processing of MBW files.



## 180 **Results**

### 181 **i) Sensor accuracy**

#### 182 **O<sub>2</sub> sensor accuracy**

183 We found that the O<sub>2</sub> sensor of the Exhalyzer D device has a non-linear O<sub>2</sub>- and CO<sub>2</sub>-  
184 dependant measurement error (Figure 1). The degree of error in the O<sub>2</sub> sensor is higher with  
185 increasing concentrations of CO<sub>2</sub> between the range of 0 – 7.5%. At conditions that reflect the  
186 end of the current standard MBW end of test (N<sub>2</sub> around 2%, expired CO<sub>2</sub> around 5%, rest O<sub>2</sub>),  
187 the O<sub>2</sub> sensor error leads to an underestimation of absolute expiratory O<sub>2</sub>-concentrations of  
188 0.8%. This in turn leads to an overestimation of calculated concentrations of N<sub>2</sub>, and makes up  
189 the majority (86%) of a total sensor error which in the example above leads to measured  
190 concentrations of N<sub>2</sub> of 2% instead of the corrected 1.03% (Table 1).

#### 191 **CO<sub>2</sub> sensor accuracy**

192 Additionally we found a residual error in the CO<sub>2</sub> sensor, currently not corrected for. The CO<sub>2</sub>  
193 sensor reading is already corrected by a factor that depends on the concentration of O<sub>2</sub> (see  
194 methods). However, the CO<sub>2</sub> sensor seems to display a different cross-sensitivity  
195 measurement error than the current signal processing takes into account (Figure 2). This  
196 residual error appears to be mainly dependant on CO<sub>2</sub> concentration (Figure 2A) and only  
197 mildly dependant on O<sub>2</sub> concentration (Figure 2B). Overall, the impact of this residual error in  
198 CO<sub>2</sub> is lower than the error of the O<sub>2</sub> sensor. It also leads to an overestimation of N<sub>2</sub>, making  
199 up 14% of the total sensor error in the standard end of test condition (Table 1).

200 The combined error of both sensors is given in Figure 3. As illustrated, the resulting error in N<sub>2</sub>  
201 is higher in very low N<sub>2</sub> concentrations and at higher CO<sub>2</sub> concentrations. The gas  
202 concentrations that exist at a typical end of N<sub>2</sub>MBW measurements (corrected N<sub>2</sub> around 2%  
203 and CO<sub>2</sub> around 5%) unfortunately result in a relatively large absolute N<sub>2</sub>-error of 0.94% and  
204 even larger relative N<sub>2</sub>-error of 47.2% (Table 1). The lowered N<sub>2</sub> concentrations throughout the  
205 entire MBW measurement (Figure 4A) lead to an end of test that is systematically reached  
206 earlier (Figure 4B).

207 **iii) Effect size of sensor correction**

208 **Sensor correction impact on MBW outcomes**

209 We re-analysed 357 MBW measurements from healthy controls (HC) and children with cystic  
210 fibrosis (CF) using the sensor correction function outlined above in a custom software. Applying  
211 the O<sub>2</sub> and CO<sub>2</sub> sensor correction function had a significant impact on all MBW outcomes  
212 (Table 1). Following the sensor correction, mean (SD) FRC and LCI decreased by 8.9 (2.2) %  
213 and 11.9 (4.0) %, respectively. The cumulative expired volume (breathing required by the  
214 patient, CEV) decreased by 19.6 (5.0) %. The reduced CEV is explained by lower end-  
215 expiratory concentrations of N<sub>2</sub>, which lead to an earlier end of test. Decreased FRC is  
216 explained by slightly lower concentrations of N<sub>2</sub> throughout the measurement. The decrease  
217 in CEV is more pronounced than for FRC, and with LCI being the ratio of those two outcomes  
218 ( $LCI = CEV/FRC$ ), this leads to an overall decrease in LCI.

219 Outcome differences due to the sensor correction can vary greatly for individual measurements  
220 (Table 2), and without re-analysis on a signal processing level it is difficult to predict how much  
221 outcomes of one measurement will change due to the sensor correction. However, outcomes  
222 on the level of a larger number of measurements before and after the correction correlate  
223 strongly. Linear fits of corrected outcomes vs standard outcomes have R<sup>2</sup> values of 0.99 for  
224 FRC, and 0.96 for LCI (Figure 5).

225 The significance of differences in LCI and FRC [L] observed between healthy controls and  
226 children with CF in standard processing were preserved after sensor correction (Table 3). On  
227 the other hand, the difference in FRC [mL/kg] between groups only became significant after  
228 correction.

229 The change in outcomes following correction is dependent on the magnitude of the outcomes  
230 themselves, for both FRC and LCI (Figure 6).

231 **Sensor correction impact on tissue nitrogen**

232 Due to the fact that N<sub>2</sub> is currently overestimated in the presence of CO<sub>2</sub>, there is a non-zero  
233 N<sub>2</sub> concentration calculated by the Exhalyzer D, even without any N<sub>2</sub> present. This minimum  
234 measurable N<sub>2</sub> concentration in current standard processing can be estimated by summing up

235 the O<sub>2</sub> and CO<sub>2</sub> sensor correction functions (Figure 7B). In conditions reflecting the end of  
236 expirations in conditions where N<sub>2</sub> is absent after correction (CO<sub>2</sub> around 5%, rest O<sub>2</sub>), the  
237 measured concentration of N<sub>2</sub> by the Exhalyzer D in standard processing is 0.94% (Table 1,  
238 Figure 7B, intersection of green line with x-axis). For this given concentration of CO<sub>2</sub>, the  
239 measured N<sub>2</sub> concentration using an Exhalyzer D could theoretically never reach lower end-  
240 expiratory values than this. If the Exhalyzer D is therefore used to quantify the impact of tissue  
241 nitrogen in long MBW measurements, a significant part of what appears to be a diffusion  
242 equilibrium of tissue nitrogen disappears after the sensor correction is applied (Figure 7A). The  
243 higher the end-expiratory concentrations of CO<sub>2</sub>, the greater the measured (artificial)  
244 concentration of N<sub>2</sub> when real N<sub>2</sub> is at 0%. (Figure 7B).

## 245 **Discussion**

### 246 **Summary**

247 We report a significant measurement error in the Eco Medics Exhalyzer D N<sub>2</sub>MBW device. At  
248 high concentrations of O<sub>2</sub>, and natural end-expiratory concentrations of CO<sub>2</sub>, the Exhalyzer D  
249 sensors underestimate O<sub>2</sub> and CO<sub>2</sub> gas concentrations and therefore overestimate end-  
250 expiratory concentrations of N<sub>2</sub>. This strongly affects the end of test criterion, and causes  
251 significant error in the assessment of FRC and LCI. It also creates a significant artificial  
252 overestimation of measured tissue nitrogen at the end of MBW tests.

#### 253 **i) Sensor accuracy**

254 We are the first group to identify this sensor cross sensitivity error. Previous validation studies  
255 as well as the internal testing of Ecomedics did not make special mention of the end of test,  
256 end-expiratory conditions examined here<sup>15</sup>. It is worth noting that this error remains relatively  
257 constrained for the readings of the individual sensors themselves (ca.1% relative error of a  
258 sensor reading) even in the most extreme case (low N<sub>2</sub>, high CO<sub>2</sub>). However, due to the design  
259 of the Exhalyzer D MBW device, and due to the fact that high O<sub>2</sub> and high CO<sub>2</sub> concentrations  
260 occur at the end of the MBW measurement, this sensor error translates into a relative N<sub>2</sub> error  
261 in the range of 47% at the corrected end of test condition. This measurement error greatly  
262 exceeds the recommendations for manufacturers outlined in the ATS/ERS consensus  
263 statement of measuring within relative 5% of tracer gas concentration<sup>20</sup>.

#### 264 **ii) Correction function**

265 The sensor error we observed in this study appears systematic and reproducible across  
266 different Exhalyzer D systems, with multiple different ground truth references confirming our  
267 findings. The correction function required to correct for the sensor error is simple and can be  
268 implemented in future signal processing of Spiroware, as well as applied retrospectively to  
269 existing data.

270 **iii) Effect size of sensor correction**

271 **Sensor correction impact on MBW outcomes**

272 The current erroneous calculated N<sub>2</sub> reading in the end of test end-expiratory condition leads  
273 to substantially lowered MBW outcomes. This result provides a new perspective on previously  
274 described differences between N<sub>2</sub> and SF6 MBW measurements<sup>21</sup>. It also offers a potential  
275 explanation for the differences observed between N<sub>2</sub>MBW outcomes measured using the  
276 Exhalyzer D and devices by other manufacturers such as ndd Medizintechnik AG (Zürich,  
277 Switzerland)<sup>22</sup>. In both studies, it was observed that primary MBW outcomes from the  
278 Exhalyzer D were higher than in the other systems, an observation that may be explained by  
279 the systematic overestimation of N<sub>2</sub> by the Exhalyzer D reported in this study. The direction of  
280 the change after correction suggests that differences between devices will be smaller. In order  
281 to validate this in detail, original data need to be reloaded using the sensor correction described  
282 here. Fortunately, the N<sub>2</sub> error has been an overestimation rather than an underestimation, as  
283 measurements can now be re-analysed without the worry that the trials might not have  
284 recorded data long enough to reach the end of test in the corrected measurement.

285 A major concern that arises with the publication of this study is that it calls into question  
286 previously published results obtained using the Exhalyzer D. It is to be expected that effect  
287 sizes, confidence intervals and significance values of MBW outcomes in such studies will  
288 change. However, while the impact of the sensor error has effects which are difficult to predict  
289 on the level of individual measurements, the impact on MBW outcomes on a large enough  
290 number of files appears more systematic. It is therefore reasonable to be optimistic that  
291 publications which observed significant differences in MBW outcomes between two groups or  
292 as a treatment effect may continue to see a difference after the sensor correction re-analysis  
293 – even though the changes observed here suggest that effect sizes will be smaller. In our  
294 opinion, re-analysis of MBW measurements should become a priority for those studies where  
295 e.g. drug approval was or is based on affected N<sub>2</sub>MBW data.

## 296 **Sensor correction impact on tissue nitrogen**

297 One previously-described feature of N<sub>2</sub> MBW tests is the fact that towards the end of a N<sub>2</sub>MBW  
298 test the concentration of N<sub>2</sub> in the lungs drops so low that a noticeable amount of N<sub>2</sub> diffuses  
299 from the body into the lungs<sup>21,23</sup>. The results of this study would suggest that the impact of  
300 tissue N<sub>2</sub> is significantly lower than previously measured with Exhalyzer D devices. The error  
301 measured in the end-expiratory, high-O<sub>2</sub> condition seems to suggest that the Exhalyzer D could  
302 not have measured any end-expiratory (CO<sub>2</sub> around 5%) concentrations of N<sub>2</sub> lower than  
303 0.94%, which would significantly perturb estimates of tissue nitrogen. The sensor correction  
304 functions introduced in this paper would therefore eliminate a substantial part of the observed  
305 tissue nitrogen in measurements performed with the Exhalyzer D (approximately 1% N<sub>2</sub> at  
306 equilibrium).

## 307 **Strengths and limitations**

308 The main strength of this study is the fact that we were able, through detailed understanding  
309 of the underlying signal processing of the Exhalyzer D, to characterize the precise impact of  
310 an observed error in gas sensors on the clinical outcomes LCI and FRC. The findings from the  
311 technical gases were confirmed by measurements using a Mass Spectrometer, both giving  
312 similar results. We developed a correction function and were thus able to estimate the  
313 measurement error precisely and correct for it.

314 The main limitation of this study is the fact that we only had a finite number of gas samples  
315 with finite precisions to test the sensors with. We chose a selection of gas concentrations from  
316 our range of interest which would exhibit cross-sensitivity effects, but could ultimately not cover  
317 the entire range of concentration combinations in MBW measurements using technical gases.  
318 However, the phase of the measurement where sensor accuracy is the most relevant for  
319 accurate MBW outcomes is the end of test, where thanks to mass spectrometry measurements  
320 we can describe the sensor error with high certainty.

321 Due to the minor contribution of argon (1.2% of N<sub>2</sub>) and the negligible contribution of neon,  
322 helium, methane, krypton etc.) these gases were omitted in the gas mixtures. In this study, the  
323 portion of gases other than oxygen and carbon dioxide is therefore referred to as nitrogen.

324 This does not change anything about the relative errors observed, although in examples closer  
325 to the reality of an MBW test, 1.2% of the fraction attributed here to N<sub>2</sub> would be considered  
326 Argon.

### 327 **Outlook**

328 In the process of conducting the research for this paper, we contacted the manufacturer for  
329 information regarding their sensor configurations and questions regarding sensor settings and  
330 signal processing. They are working on a solution to both re-analyse past measurements and  
331 to improve the signal processing for future measurements in an upcoming version of  
332 Spiroware.

### 333 **Conclusion**

334 An error in the cross sensitivity correction between the oxygen and carbon dioxide gas sensors  
335 of the Exhalyzer D device leads to an overestimation of FRC and LCI. Correction of this error  
336 is possible but needs to be applied breath-by-breath by re-analysing the measurements in an  
337 updated software version.

## 338 **References**

- 339 1. Usemann J, Yammine S, Singer F, Latzin P. Inert gas washout: background and  
340 application in various lung diseases. *Swiss Med Wkly*. 2017;147:w14483.  
341 doi:10.4414/smw.2017.14483.
- 342 2. Robinson PD, Goldman MD, Gustafsson PM. Inert gas washout: theoretical background  
343 and clinical utility in respiratory disease. *Respiration*. 2009;78(3):339–355.  
344 doi:10.1159/000225373.
- 345 3. Kent L, Reix P, Innes JA, Zielen S, Le Bourgeois M, Braggion C, Lever S, Arets HGM,  
346 Brownlee K, Bradley JM, et al. Lung clearance index: evidence for use in clinical trials in  
347 cystic fibrosis. *J Cyst Fibros*. 2014;13(2):123–138. doi:10.1016/j.jcf.2013.09.005.
- 348 4. Perrem L, Stanojevic S, Shaw M, Jensen R, McDonald N, Isaac SM, Davis M, Clem C,  
349 Guido J, Jara S, et al. Lung Clearance Index to Track Acute Respiratory Events in  
350 School-age Children with Cystic Fibrosis. *Am J Respir Crit Care Med*. 2020.  
351 doi:10.1164/rccm.202006-2433OC.
- 352 5. Stanojevic S, Davis SD, Retsch-Bogart G, Webster H, Davis M, Johnson RC, Jensen R,  
353 Pizarro ME, Kane M, Clem CC, et al. Progression of Lung Disease in Preschool Patients  
354 with Cystic Fibrosis. *Am J Respir Crit Care Med*. 2017;195(9):1216–1225.  
355 doi:10.1164/rccm.201610-2158OC.
- 356 6. Frauchiger BS, Binggeli S, Yammine S, Spycher B, Krüger L, Ramsey KA, Latzin P.  
357 Longitudinal Course of Clinical Lung Clearance Index in Children with Cystic Fibrosis.  
358 *Eur Respir J*. 2020. doi:10.1183/13993003.02686-2020.
- 359 7. Nyilas S, Bauman G, Pusterla O, Sommer G, Singer F, Stranzinger E, Heyer C, Ramsey  
360 K, Schlegtendal A, Benzrath S, et al. Structural and Functional Lung Impairment in  
361 Primary Ciliary Dyskinesia. Assessment with Magnetic Resonance Imaging and Multiple-  
362 breath Washout in Comparison to Spirometry. *Ann Am Thorac Soc*. 2018;15(12):1434–  
363 1442. doi:10.1513/AnnalsATS.201712-967OC.
- 364 8. Kinghorn B, McNamara S, Genatossio A, Sullivan E, Siegel M, Bauer I, Clem C, Johnson  
365 RC, Davis M, Griffiths A, et al. Comparison of Multiple-breath Washout and Spirometry in



- 366 Children with Primary Ciliary Dyskinesia and Cystic Fibrosis and Healthy Controls. *Ann*  
367 *Am Thorac Soc.* 2020. doi:10.1513/AnnalsATS.201905-375OC.
- 368 9. Saunders C, Jensen R, Robinson PD, Stanojevic S, Klingel M, Short C, Davies JC,  
369 Ratjen F. Integrating the multiple-breath washout test into international multicentre trials.  
370 *J Cyst Fibros.* 2020;19(4):602–607. doi:10.1016/j.jcf.2019.11.006.
- 371 10. Subbarao P, Milla C, Aurora P, Davies JC, Davis SD, Hall GL, Heltshe S, Latzin P,  
372 Lindblad A, Pittman JE, et al. Multiple-Breath Washout as a Lung Function Test in Cystic  
373 Fibrosis. A Cystic Fibrosis Foundation Workshop Report. *Ann Am Thorac Soc.*  
374 2015;12(6):932–939. doi:10.1513/AnnalsATS.201501-021FR.
- 375 11. Milla CE, Ratjen F, Marigowda G, Liu F, Waltz D, Rosenfeld M. Lumacaftor/Ivacaftor in  
376 Patients Aged 6-11 Years with Cystic Fibrosis and Homozygous for F508del-CFTR. *Am*  
377 *J Respir Crit Care Med.* 2017;195(7):912–920. doi:10.1164/rccm.201608-1754OC.
- 378 12. Davies J, Sheridan H, Bell N, Cunningham S, Davis SD, Elborn JS, Milla CE, Starner TD,  
379 Weiner DJ, Lee P-S, et al. Assessment of clinical response to ivacaftor with lung  
380 clearance index in cystic fibrosis patients with a G551D-CFTR mutation and preserved  
381 spirometry: a randomised controlled trial. *Lancet Respir Med.* 2013;1(8):630–638.  
382 doi:10.1016/S2213-2600(13)70182-6.
- 383 13. Davies JC, Sermet-Gaudelus I, Naehrlich L, Harris RS, Campbell D, Ahluwalia N, Short  
384 C, Haseltine E, Panorchan P, Saunders C, et al. A phase 3, double-blind, parallel-group  
385 study to evaluate the efficacy and safety of tezacaftor in combination with ivacaftor in  
386 participants 6 through 11 years of age with cystic fibrosis homozygous for F508del or  
387 heterozygous for the F508del-CFTR mutation and a residual function mutation. *J Cyst*  
388 *Fibros.* 2020. doi:10.1016/j.jcf.2020.07.023.
- 389 14. Ratjen F, Hug C, Marigowda G, Tian S, Huang X, Stanojevic S, Milla CE, Robinson PD,  
390 Waltz D, Davies JC, et al. Efficacy and safety of lumacaftor and ivacaftor in patients aged  
391 6–11 years with cystic fibrosis homozygous for F508del-CFTR: a randomised, placebo-  
392 controlled phase 3 trial. *The Lancet Respiratory Medicine.* 2017;5(7):557–567.  
393 doi:10.1016/S2213-2600(17)30215-1.

- 394 15. Singer F, Houltz B, Latzin P, Robinson P, Gustafsson P. A realistic validation study of a  
395 new nitrogen multiple-breath washout system. *PLoS ONE*. 2012;7(4):e36083.  
396 doi:10.1371/journal.pone.0036083.
- 397 16. Anagnostopoulou P, Latzin P, Jensen R, Stahl M, Harper A, Yammine S, Usemann J,  
398 Foong RE, Spycher B, Hall GL, et al. Normative data for multiple-breath washout  
399 outcomes in school-aged Caucasian children. *Eur Respir J*. 2020;55(4).  
400 doi:10.1183/13993003.01302-2019.
- 401 17. Korten I, Kieninger E, Yammine S, Regamey N, Nyilas S, Ramsey K, Casaulta C, Latzin  
402 P, For TSSG. The Swiss Cystic Fibrosis Infant Lung Development (SCILD) cohort. *Swiss  
403 Med Wkly*. 2018;148:w14618. doi:10.4414/smw.2018.14618.
- 404 18. Gustafsson PM, Robinson PD, Lindblad A, Oberli D. Novel methodology to perform  
405 sulfur hexafluoride (SF<sub>6</sub>)-based multiple-breath wash-in and washout in infants using  
406 current commercially available equipment. *J Appl Physiol (1985)*. 2016;121(5):1087–  
407 1097. doi:10.1152/jappphysiol.00115.2016.
- 408 19. Cummings B, Hamilton ML, Ciaffoni L, Pragnell TR, Peverall R, Ritchie GAD, Hancock  
409 G, Robbins PA. Laser-based absorption spectroscopy as a technique for rapid in-line  
410 analysis of respired gas concentrations of O<sub>2</sub> and CO<sub>2</sub>. *J Appl Physiol (1985)*.  
411 2011;111(1):303–307. doi:10.1152/jappphysiol.00119.2011.
- 412 20. Robinson PD, Latzin P, Verbanck S, Hall GL, Horsley A, Gappa M, Thamrin C, Arets  
413 HGM, Aurora P, Fuchs SI, et al. Consensus statement for inert gas washout  
414 measurement using multiple- and single- breath tests. *Eur Respir J*. 2013;41(3):507–522.  
415 doi:10.1183/09031936.00069712.
- 416 21. Jensen R, Stanojevic S, Gibney K, Salazar JG, Gustafsson P, Subbarao P, Ratjen F.  
417 Multiple-breath nitrogen washout: a feasible alternative to mass spectrometry. *PLoS  
418 ONE*. 2013;8(2):e56868. doi:10.1371/journal.pone.0056868.
- 419 22. Poncin W, Singer F, Aubriot A-S, Lebecque P. Agreement between multiple-breath  
420 nitrogen washout systems in children and adults. *J Cyst Fibros*. 2017;16(2):258–266.  
421 doi:10.1016/j.jcf.2016.11.004.

- 422 23. Nielsen N, Nielsen JG, Horsley AR. Evaluation of the impact of alveolar nitrogen  
423 excretion on indices derived from multiple-breath nitrogen washout. PLoS ONE.  
424 2013;8(9):e73335. doi:10.1371/journal.pone.0073335.

425 **Figure 1**

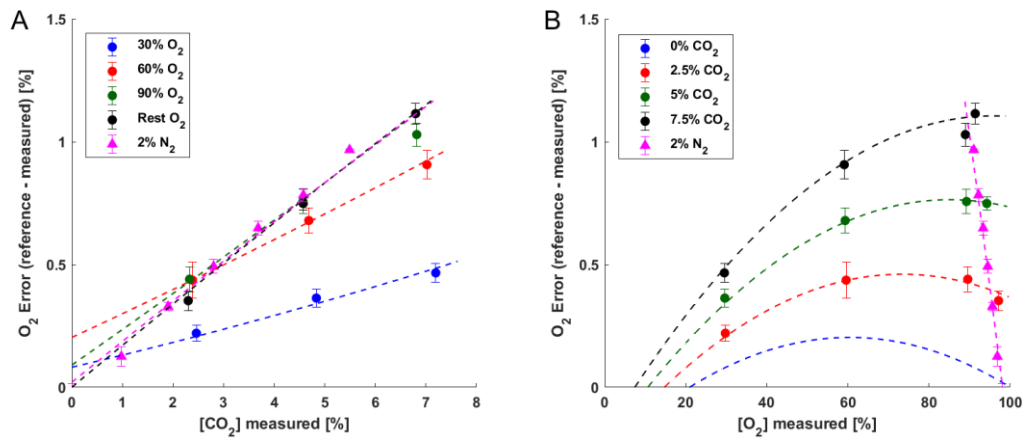

426

427 *Figure 1: Observed absolute error between known reference and measured O<sub>2</sub> concentrations. (dots: mean of error*  
428 *for one gas mixture, error bars: +/- SD of error). Curves represent a two parameter quadratic polynomial fitted*  
429 *through the error values (see OLS for details), represented here as curves for given CO<sub>2</sub> or O<sub>2</sub> concentrations. Dots*  
430 *represent measurements performed with 12 technical gas mixtures as reference, triangles represent mass*  
431 *spectrometry reference measurements of 6 mixtures at the end of test condition (2% N<sub>2</sub>). **A)** Absolute O<sub>2</sub> error as*  
432 *a function of CO<sub>2</sub> concentration, **B)** Absolute O<sub>2</sub> error as a function of O<sub>2</sub> concentration. Dashed curves all represent*  
433 *the same fit  $f(O_2, CO_2)$ .*

434 **Figure 2**

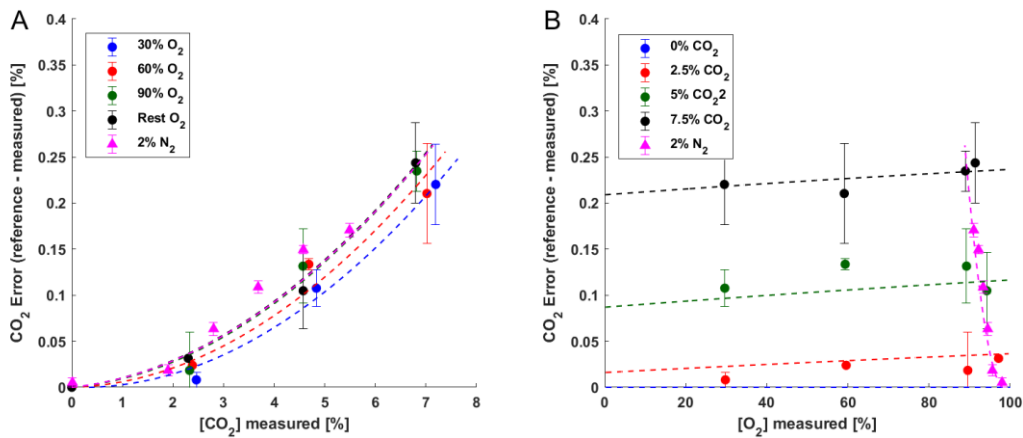

435

436 *Figure 2: Observed absolute error between known and measured CO<sub>2</sub> concentrations. (dots: mean of error of one*  
437 *gas mixture, error bars: +/- SD of error). Curves represent a two parameter quadratic polynomial fitted through the*  
438 *error values (see OLS for details), represented here as curves for given CO<sub>2</sub> or O<sub>2</sub> concentrations. Dots represent*  
439 *measurements performed with 12 technical gas mixtures as reference, triangles represent mass spectrometry*  
440 *reference measurements on 6 mixtures at the end of test condition (2% N<sub>2</sub>). **A**) Absolute CO<sub>2</sub> error as a function of*  
441 *CO<sub>2</sub> concentration, **B**) Absolute CO<sub>2</sub> error as a function of O<sub>2</sub> concentration. Dashed curves all represent the same*  
442 *fit  $f(O_2, CO_2)$ .*

443 **Figure 3**

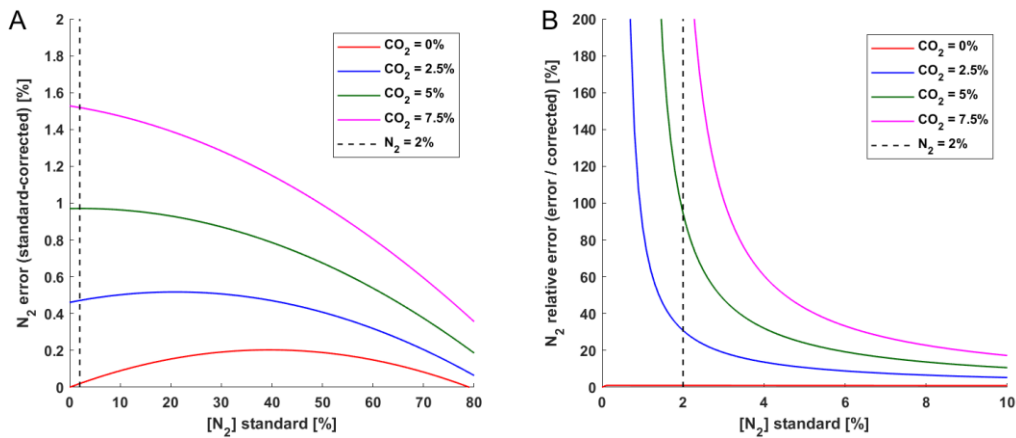

444

445 *Figure 3: N<sub>2</sub> error as a function of measured N<sub>2</sub>. Illustration of the impact of the O<sub>2</sub> and CO<sub>2</sub> correction functions*  
446 *on final measured N<sub>2</sub>. **A)** Summed up correction functions of Figure 1 and Figure 2, and therefore absolute error in*  
447 *N<sub>2</sub>, represented as curve for selected concentrations of CO<sub>2</sub>. **B)** Relative error in measurement of N<sub>2</sub> ( standard-*  
448 *corrected)/corrected ) as a function of N<sub>2</sub>.*

449 **Figure 4**

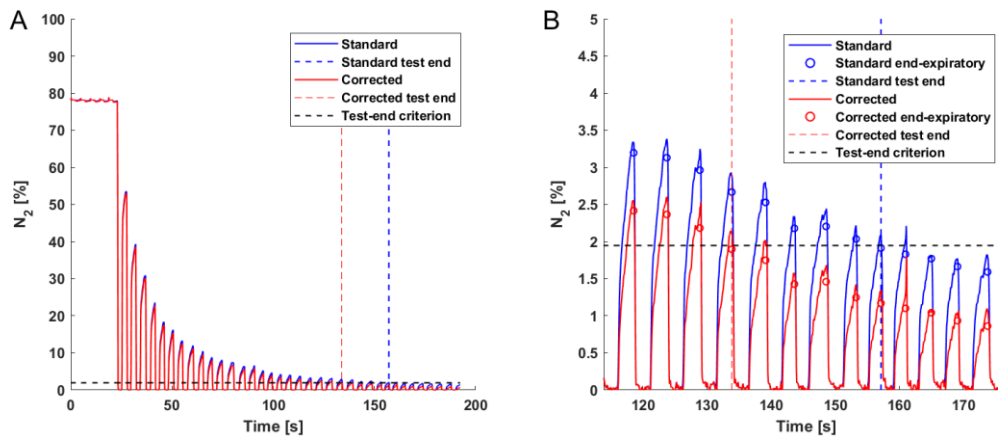

450

451 *Figure 4: Illustration of the effect of the sensor correction on the  $N_2$  signal and consequently on the end of test of*  
452 *an example MBW measurement. Traced in blue is the signal output of the standard signal processing, corrected*  
453 *signal is shown in red. Vertical dashed lines represent the end of test for the current standard and corrected*  
454 *measurement respectively. The black line corresponds to  $1/40^{\text{th}}$  of the initial  $N_2$  concentration (end of test criterium).*  
455 **A)** *Time course of  $N_2$  throughout a standard MBW measurement. B)* *Zoom into the critical period of end of test*  
456 *determination. In this example the test ends 5 breaths earlier in the corrected measurement compared to standard.*

457 **Figure 5**

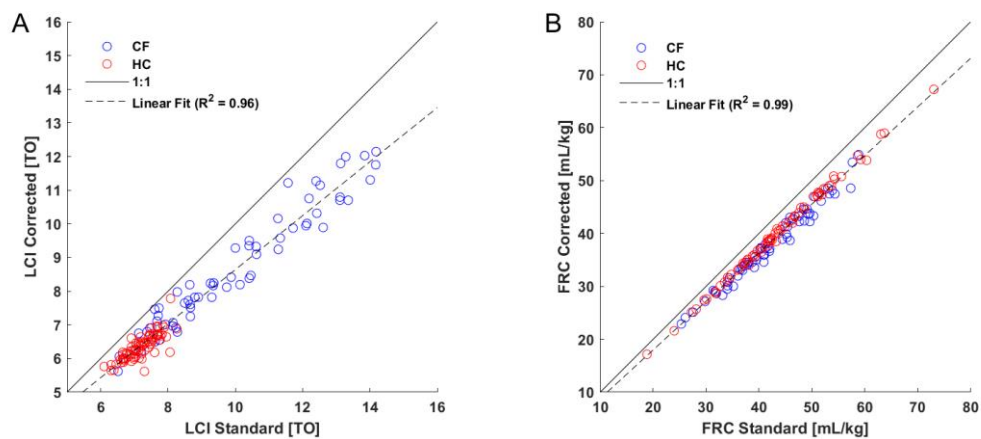

458

459 *Figure 5: MBW outcomes (A) LCI (B) FRC) after sensor correction (corrected) vs current standard (standard), in*  
460 *healthy controls (HC) and patients with cystic fibrosis (CF).*



461 **Figure 6**

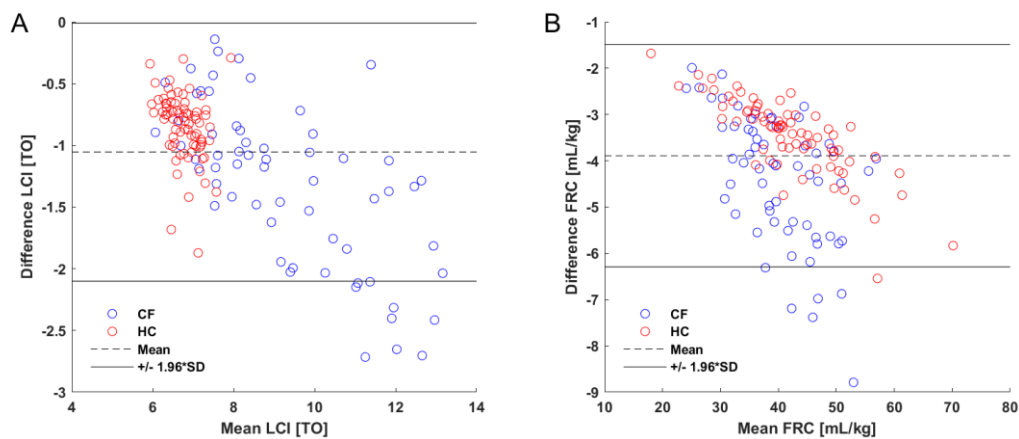

462

463 *Figure 6: Bland-Altman plot of the absolute difference (corrected – standard) in MBW outcomes (A) LCI (B) FRC)*

464 *due to sensor correction, plotted as a function of the outcomes themselves (mean of corrected and standard).*

465 **Figure 7**

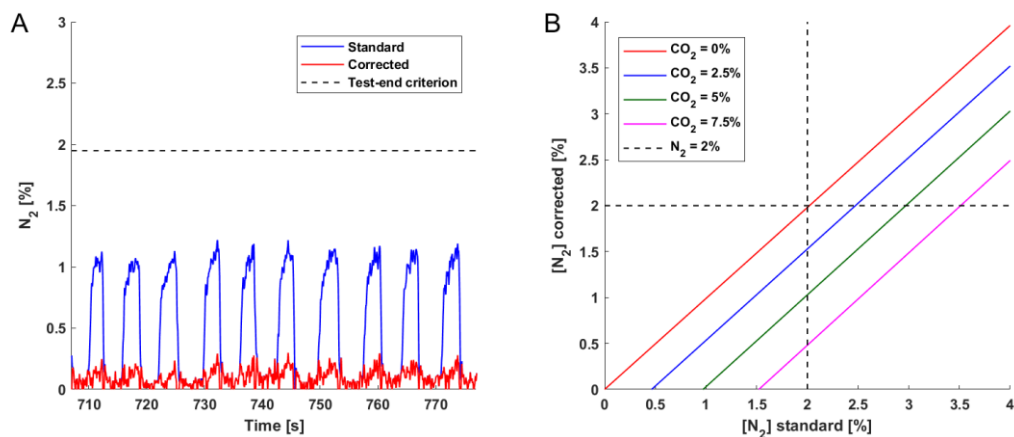

466

467 *Figure 7: Illustration of the effect of the sensor correction function on nitrogen measurement in the late phase of*  
468 *MBW tests. A) Example of the equilibrium  $N_2$  reached in a very long continued MBW measurement using the*  
469 *Exhalyzer D, displaying a greatly decreased  $N_2$ -back-diffusion equilibrium (tissue nitrogen). B) Corrected  $N_2$*   
470 *plotted against standard  $N_2$  in conditions around the end of test condition (2%  $N_2$ ).*

471 **Table 1**

| Condition              | Standard          |                    |                   | Corrected         |                    |                   | N <sub>2</sub> Error |      | Contribution       |                   |
|------------------------|-------------------|--------------------|-------------------|-------------------|--------------------|-------------------|----------------------|------|--------------------|-------------------|
|                        | [N <sub>2</sub> ] | [CO <sub>2</sub> ] | [O <sub>2</sub> ] | [N <sub>2</sub> ] | [CO <sub>2</sub> ] | [O <sub>2</sub> ] | abs                  | rel  | [CO <sub>2</sub> ] | [O <sub>2</sub> ] |
| Standard test-end [%]  | 2                 | 5                  | 93                | 1.03              | 5.14               | 93.8              | 0.97                 | 94.4 | 14.2               | 85.8              |
| Corrected test-end [%] | 2.94              | 4.87               | 92.2              | 2                 | 5                  | 93                | 0.94                 | 47.2 | 13.9               | 86.1              |
| No nitrogen [%]        | 0.94              | 4.87               | 94.2              | 0                 | 5                  | 95                | 0.94                 |      |                    |                   |

472

473 *Table 1: Specific examples of sensor error impact on measurement of N<sub>2</sub> in three conditions of interest. Standard*  
474 *concentrations denote concentrations measured in standard Spiroware 3.2.1 processing. Corrected concentrations*  
475 *correspond to concentrations after sensor correction is applied. N<sub>2</sub> error summarizes the absolute difference*  
476 *between N<sub>2</sub> in standard vs. corrected, as well as the relative error (standard-corrected)/corrected. The relative*  
477 *contribution of each sensor to the total error is listed under "Contribution". For simplicity, the presence of Argon is*  
478 *omitted here.*

479 **Table 2**

|             | n   | Standard | Corrected | Difference |          |        |               |                   |
|-------------|-----|----------|-----------|------------|----------|--------|---------------|-------------------|
|             |     |          |           | mean       | mean [%] | SD [%] | 95% CI [%]    | p-value           |
| FRC [mL/kg] | 147 | 43.9     | 40.0      | 3.9        | -8.9     | 2.2    | -9.3 - -8.6   | <b>&lt;0.0001</b> |
| CEV [L]     | 147 | 14.9     | 11.9      | 3.0        | -19.6    | 5.0    | -20.4 - -18.8 | <b>&lt;0.0001</b> |
| LCI [TO]    | 147 | 8.3      | 7.3       | 1.0        | -11.9    | 4.0    | -12.5 - -11.2 | <b>&lt;0.0001</b> |

480 Bold print indicates statistical significance.

481 *Table 2: Effects of sensor correction on main MBW outcomes. Relative difference is calculated as 100\*(corrected*  
482 *- standard)/standard.*

483 **Table 3**

|                       |                  | n  | Standard |      |                      | Corrected |      |                      | Difference |      |             |                   |
|-----------------------|------------------|----|----------|------|----------------------|-----------|------|----------------------|------------|------|-------------|-------------------|
|                       |                  |    | mean     | SD   | p-value <sup>#</sup> | mean      | SD   | p-value <sup>#</sup> | mean       | %    | 95% CI      | p-value*          |
| <b>LCI</b><br>[TO]    | Healthy controls | 85 | 7.12     | 0.51 |                      | 6.30      | 0.40 |                      | 0.82       | 11.5 | 0.76 - 0.88 | <b>&lt;0.0001</b> |
|                       | Cystic fibrosis  | 62 | 9.99     | 2.21 |                      | 8.69      | 1.77 |                      | 1.30       | 13.1 | 1.14 - 1.47 | <b>&lt;0.0001</b> |
|                       | Difference       |    | -2.87    |      | <b>&lt;0.0001</b>    | -2.38     |      | <b>&lt;0.0001</b>    |            |      |             |                   |
| <b>FRC</b><br>[L]     | Healthy controls | 85 | 1.87     | 0.95 |                      | 1.73      | 0.89 |                      | 0.14       | 7.7  | 0.07 - 0.13 | <b>&lt;0.0001</b> |
|                       | Cystic fibrosis  | 62 | 1.31     | 0.61 |                      | 1.17      | 0.53 |                      | 0.14       | 10.7 | 0.12 - 0.16 | <b>&lt;0.0001</b> |
|                       | Difference       |    | 0.56     |      | <b>&lt;0.0001</b>    | 0.56      |      | <b>&lt;0.0001</b>    |            |      |             |                   |
| <b>FRC</b><br>[mL/kg] | Healthy controls | 85 | 45.1     | 10.5 |                      | 41.6      | 9.8  |                      | 3.51       | 7.8  | 3.33 - 3.70 | <b>&lt;0.0001</b> |
|                       | Cystic fibrosis  | 62 | 42.3     | 8.0  |                      | 37.9      | 7.2  |                      | 4.40       | 10.4 | 4.03 - 4.76 | <b>&lt;0.0001</b> |
|                       | Difference       |    | 2.86     |      | 0.0631               | 3.75      |      | <b>0.0086</b>        |            |      |             |                   |

\*paired t test; #unpaired t test

Bold print indicates statistical significance.

484

485 *Table 3: Summary of the differences in Lung Clearance Index (LCI) and functional residual capacity (FRC) between healthy controls (HC) and patients with cystic fibrosis (CF)*  
 486 *in the retrospective dataset before (standard) and after (corrected) the application of the sensor correction function.*
